# Supplementary material for: Athena: Automated Tuning of k-mer based Genomic Error Correction Algorithms using Language Models
Source: PubMed Central journal article supplement (PMC6834855; doi:10.1038/s41598-019-52196-4), 2019-11-06
Supplement: 41598_2019_52196_MOESM1_ESM.pdf [file 41598_2019_52196_MOESM1_ESM.pdf]

# ATHENA: Automated Tuning of $k$ -mer based Genomic Error Correction Algorithms using Language Models

Mustafa Abdallah<sup>1,+</sup>, Ashraf Mahgoub<sup>1,+</sup>, Hany Ahmed<sup>2</sup>, and Somali Chaterji<sup>3,\*</sup>

<sup>1</sup>School of Electrical and Computer Engineering, Purdue University, West Lafayette, USA

<sup>2</sup>Department of Electronics and Electrical Communications Engineering, Cairo University, Cairo, Egypt

<sup>3</sup>School of Agricultural and Biological Engineering, Purdue University, West Lafayette, USA

\*schaterji@schaterji.io

+these authors contributed equally to this work

## ABSTRACT

The performance of most error-correction (EC) algorithms that operate on genomics reads is dependent on the proper choice of its configuration parameters, such as the value of  $k$  in  $k$ -mer based techniques. In this work, we target the problem of finding the best values of these configuration parameters to optimize error correction and consequently improve genome assembly. We perform this in an adaptive manner, adapted to different datasets *and* to EC tools, due to the observation that different configuration parameters are optimal for different datasets, *i.e.*, from different platforms and species, and vary with the EC algorithm being applied. We use language modeling techniques from the Natural Language Processing (NLP) domain in our algorithmic suite, **ATHENA**, to automatically tune the performance-sensitive configuration parameters. Through the use of  $N$ -Gram and Recurrent Neural Network (RNN) language modeling, we validate the intuition that the EC performance can be computed quantitatively and efficiently using the “perplexity” metric, repurposed from NLP. After training the language model, we show that the perplexity metric calculated from a sample of the test (or production) data has a strong negative correlation with the quality of error correction of erroneous NGS reads. Therefore, we use the perplexity metric to guide a hill climbing-based search, converging toward the best configuration parameter value. Our approach is suitable for both *de novo* and comparative sequencing (resequencing), eliminating the need for a reference genome to serve as the ground truth.

We find that **ATHENA** can automatically find the optimal value of  $k$  with a very high accuracy for 7 real datasets and using 3 different  $k$ -mer based EC algorithms, Lighter, Blue, and Racer. The inverse relation between the perplexity metric and alignment rate exists under all our tested conditions—for real and synthetic datasets, for all kinds of sequencing errors (insertion, deletion, and substitution), and for high and low error rates. The absolute value of that correlation is at least 73%. In our experiments, the best value of  $k$  found by **ATHENA** achieves an alignment rate within 0.53% of the oracle best value of  $k$  found through exhaustive search (*i.e.*, scanning through the entire range of  $k$  values). With best parameter selection by **ATHENA**, the assembly quality (NG50) is improved by a Geometric Mean of 4.72X across the 7 real datasets.

## 1 Appendix

### Detailed Results

In this section, we show a detailed version of the results presented in Table ??.

| EC Tool | Dataset       | Tuned Parameter | Perplexity (RNN) | Perplexity (N-Gram) | Overall Alignment Rate | Gain (%)       |
|---------|---------------|-----------------|------------------|---------------------|------------------------|----------------|
| Lighter | D1            | k = 10          | 103.0058         | 20.42               | 97.45%                 | -0.01%         |
|         |               | k = 15          | 103.0048         | 16.86               | 98.83%                 | 87.50%         |
|         |               | <b>k = 17</b>   | <b>103.0040</b>  | <b>16.70</b>        | <b>98.95%</b>          | <b>96.30%</b>  |
|         |               | k = 25          | 103.0055         | 18.22               | 97.98%                 | 69.50%         |
|         | D2            | k = 10          | 204.849          | 121.88              | 56.90%                 | 0%             |
|         |               | k = 15          | 204.775          | 102.13              | <b>61.42%</b>          | 73.80%         |
|         |               | <b>k = 17</b>   | <b>204.760</b>   | <b>100.30</b>       | 61.15%                 | <b>80.10%</b>  |
|         | D3            | k = 25          | 204.795          | 107.37              | 59.19%                 | 69.96%         |
|         |               | k = 10          | 200.513          | 52.81               | 72.91%                 | 0%             |
|         |               | k = 15          | 200.432          | 33.26               | <b>80.44%</b>          | 86.78%         |
|         | D4            | <b>k = 17</b>   | <b>200.432</b>   | <b>32.74</b>        | 80.39%                 | <b>95.34%</b>  |
|         |               | k = 25          | 200.529          | 42.28               | 75.33%                 | 65.00%         |
|         |               | k = 10          | 207.295          | 25.53               | 92.14%                 | 0%             |
|         | D5            | k = 15          | 206.248          | 18.07               | 93.72%                 | 86.14%         |
|         |               | <b>k = 17</b>   | <b>204.899</b>   | <b>17.86</b>        | <b>93.95%</b>          | 89.87%         |
|         |               | <b>k = 25</b>   | <b>206.848</b>   | <b>18.25</b>        | 93.13%                 | <b>89.90 %</b> |
|         | D6            | k = 10          | 193.121          | 6.44                | 91.92%                 | 0%             |
|         |               | k = 15          | 193.052          | 5.45                | 92.11%                 | 73.12%         |
|         |               | k = 17          | 193.054          | <b>5.35</b>         | <b>92.15%</b>          | 81.70%         |
|         |               | <b>k = 25</b>   | <b>193.052</b>   | 5.36                | 92.09%                 | <b>83.80%</b>  |
|         | D7            | k = 10          | 199.452          | 638.82              | 85.56%                 | NA             |
|         |               | k = 15          | <b>198.557</b>   | 571.62              | 84.20%                 | NA             |
|         |               | k = 17          | 199.245          | <b>521.21</b>       | 85.63%                 | NA             |
|         |               | <b>k = 25</b>   | 199.457          | 521.92              | <b>86.16%</b>          | NA             |
| k = 30  |               | 199.450         | 527.85           | 86.10%              | NA                     |                |
| D7      | k = 10        | 251.64          | 2112.4           | 38.06%              | 0%                     |                |
|         | <b>k = 15</b> | <b>251.04</b>   | 1871.3           | <b>40.53%</b>       | <b>37.58%</b>          |                |
|         | k = 17        | 251.59          | <b>1866.4</b>    | 40.24%              | 7.7%                   |                |
|         | k = 25        | 251.69          | 1891             | 38.39%              | -1.2%                  |                |

**Table 1.** Detailed results for our 7 datasets using Lighter: a comparison between finding best value of  $k$  using ATHENA variants vs exhaustive searching. These results are consistent with the reported results by Lighter’s authors (Figure 5 in<sup>2</sup>).

| EC Tool | Dataset | Tuned Parameter | Perplexity (RNN) | Perplexity (N-Gram) | Overall Alignment Rate | Gain (%)      |
|---------|---------|-----------------|------------------|---------------------|------------------------|---------------|
| Blue    | D1      | <b>k = 20</b>   | 206.033          | <b>16.52</b>        | <b>99.53%</b>          | <b>99.00%</b> |
|         |         | k = 25          | <b>206.026</b>   | 16.62               | 99.29%                 | 98.60%        |
|         |         | k = 30          | 206.0361         | 16.96               | 98.65%                 | 87.60%        |
|         | D2      | <b>k = 20</b>   | <b>204.846</b>   | <b>119.17</b>       | <b>57.44%</b>          | <b>4.61%</b>  |
|         |         | k = 25          | 204.848          | 120.52              | 57.09%                 | 1.70%         |
|         | D3      | k = 30          | 204.847          | 238.98              | 57.00%                 | 1.24%         |
|         |         | <b>k = 20</b>   | <b>200.460</b>   | <b>29.89</b>        | <b>84.17%</b>          | <b>99.20%</b> |
|         | D4      | k = 25          | 200.490          | 32.39               | 81.62%                 | 97.70%        |
|         |         | k = 30          | 200.510          | 49.22               | 73.84%                 | 13.17 %       |
|         | D5      | <b>k = 20</b>   | <b>207.179</b>   | <b>46.60</b>        | <b>95.31%</b>          | <b>98.50%</b> |
|         |         | k = 25          | 207.228          | 47.59               | 94.64%                 | 98.40%        |
|         | D6      | k = 30          | 207.284          | 48.69               | 93.97%                 | 96.50%        |
|         |         | <b>k = 20</b>   | <b>192.804</b>   | <b>15.67</b>        | <b>92.33%</b>          | 88.90%        |
|         | D7      | k = 25          | 192.8044         | 15.72               | 92.28%                 | 91.20%        |
|         |         | k = 30          | 192.8077         | 15.79               | 92.22%                 | <b>92.08%</b> |
|         | D7      | k = 20          | 199.939          | 1692.42             | 82.79%                 | NA            |
|         |         | k = 25          | 199.569          | <b>1682.138</b>     | 86.07%                 | NA            |
|         |         | <b>k = 30</b>   | <b>199.516</b>   | 1693.225            | <b>86.18%</b>          | NA            |
|         | D7      | k = 20          | 316.24           | 2017.2              | 16.84%                 | <b>7.34%</b>  |
|         |         | <b>k = 25</b>   | <b>316.22</b>    | <b>2015.3</b>       | <b>17.19%</b>          | 3.57%         |
|         | D7      | k = 30          | <b>316.09</b>    | 2052.1              | 16.96%                 | 1.47%         |

**Table 2.** Detailed results for our 7 datasets using Blue Error correction tool. We notice that Blue was able to achieve good correction for all datasets except D2 and D7, which had the highest error rate.

| EC Tool | Dataset | Tuned Parameter  | Perplexity (RNN) | Perplexity (N-Gram) | Overall Alignment Rate | Gain(%)       |
|---------|---------|------------------|------------------|---------------------|------------------------|---------------|
| Racer   | D1      | <b>GL = 4.7M</b> | <b>206.0330</b>  | <b>16.60</b>        | <b>99.26%</b>          | <b>84.80%</b> |
|         |         | GL = 20M         | 206.0360         | 16.90               | 98.85%                 | 80.30%        |
|         |         | GL = 30M         | 206.0357         | 16.99               | 98.82%                 | 77.60%        |
|         | D2      | <b>GL = 4.7M</b> | <b>204.7520</b>  | <b>85.14</b>        | <b>81.15%</b>          | 92.90%        |
|         |         | GL = 7M          | 204.7564         | 85.20               | 81.13%                 | <b>93.00%</b> |
|         |         | GL = 30M         | 204.7750         | 88.24               | 79.24%                 | 91.90%        |
|         | D3      | <b>GL = 3.7M</b> | <b>200.4552</b>  | <b>30.40</b>        | <b>84.11%</b>          | 88.27%        |
|         |         | GL = 20M         | 200.4603         | 33.87               | 80.97%                 | 80.21%        |
|         |         | GL = 30M         | 200.4626         | 34.46               | 80.79%                 | 75.74%        |
|         | D4      | <b>GL = 4.2M</b> | <b>206.9420</b>  | <b>17.32</b>        | <b>95.33%</b>          | <b>97.00%</b> |
|         |         | GL = 20M         | 206.9494         | 17.51               | 95.04%                 | 96.50%        |
|         |         | GL = 30M         | 206.9489         | 17.53               | 95.01%                 | 95.90%        |
|         | D5      | <b>GL = 4.2M</b> | 193.0454         | <b>4.77</b>         | <b>92.29%</b>          | 81.63%        |
|         |         | GL = 20M         | <b>193.0451</b>  | 4.78                | 92.28%                 | 80.50%        |
|         |         | GL = 30M         | 193.0479         | 4.79                | 92.26%                 | <b>81.90%</b> |
|         | D6      | GL = 20M         | 199.403          | <b>236.66</b>       | 86.12%                 | NA            |
|         |         | GL = 30M         | 199.401          | 242.61              | 85.76%                 | NA            |
|         |         | <b>GL = 120M</b> | <b>199.391</b>   | 253.34              | <b>86.36%</b>          | NA            |
|         | D7      | <b>GL = 3M</b>   | 251.73           | <b>1708</b>         | <b>17.55%</b>          | 21.1%         |
|         |         | GL = 20M         | <b>251.65</b>    | 1751.2              | 17.40%                 | <b>26.5%</b>  |
|         |         | GL = 30M         | 251.68           | 1774.4              | 17.38%                 | 24.4%         |

**Table 3.** Detailed results for our 7 datasets using Racer. The first row shows the results with respect to the exact genome length (*i.e.*, calculated from the reference genome).
